# Supplementary material for: δ60Ni and δ13C Composition of Serpentinites and Carbonates of the Tekirova Ophiolite, Turkey, and Meatiq Ophiolite, Egypt
Source: Frontiers journal article supplement (doi:10.3389/feart.2021.651967), 2021-06-11
Supplement: Data_Sheet_1.PDF [file Data_Sheet_1.PDF]

**Supplementary material for  $\delta^{60}\text{Ni}$  and  $\delta^{13}\text{C}$  composition of serpentinites and carbonates  
of the Tekirova ophiolite, Turkey, and Meatiq ophiolite, Egypt**

**Anna Neubeck<sup>1\*</sup>, Arjen Boosman<sup>2</sup>, Hakan Hosgörmez<sup>3</sup>, Dogacan Özcan<sup>3</sup>, Arman Boskabadi<sup>4</sup>, Magnus Ivarsson<sup>5</sup>, Olivier Rouxel<sup>6</sup>**

*<sup>1.</sup> Department of Earth Sciences, Uppsala University, Sweden*

*<sup>2.</sup> Department of Earth Sciences, Utrecht University, The Netherlands*

*<sup>3.</sup> Department of Geological Engineering, Istanbul University - Cerrahpasa, Turkey*

*<sup>4.</sup> Department of Geological Sciences, Stockholm University, Sweden*

*<sup>5.</sup> Swedish Museum of Natural History, Sweden*

*<sup>6.</sup> Ifremer, France*

Electron Image 26

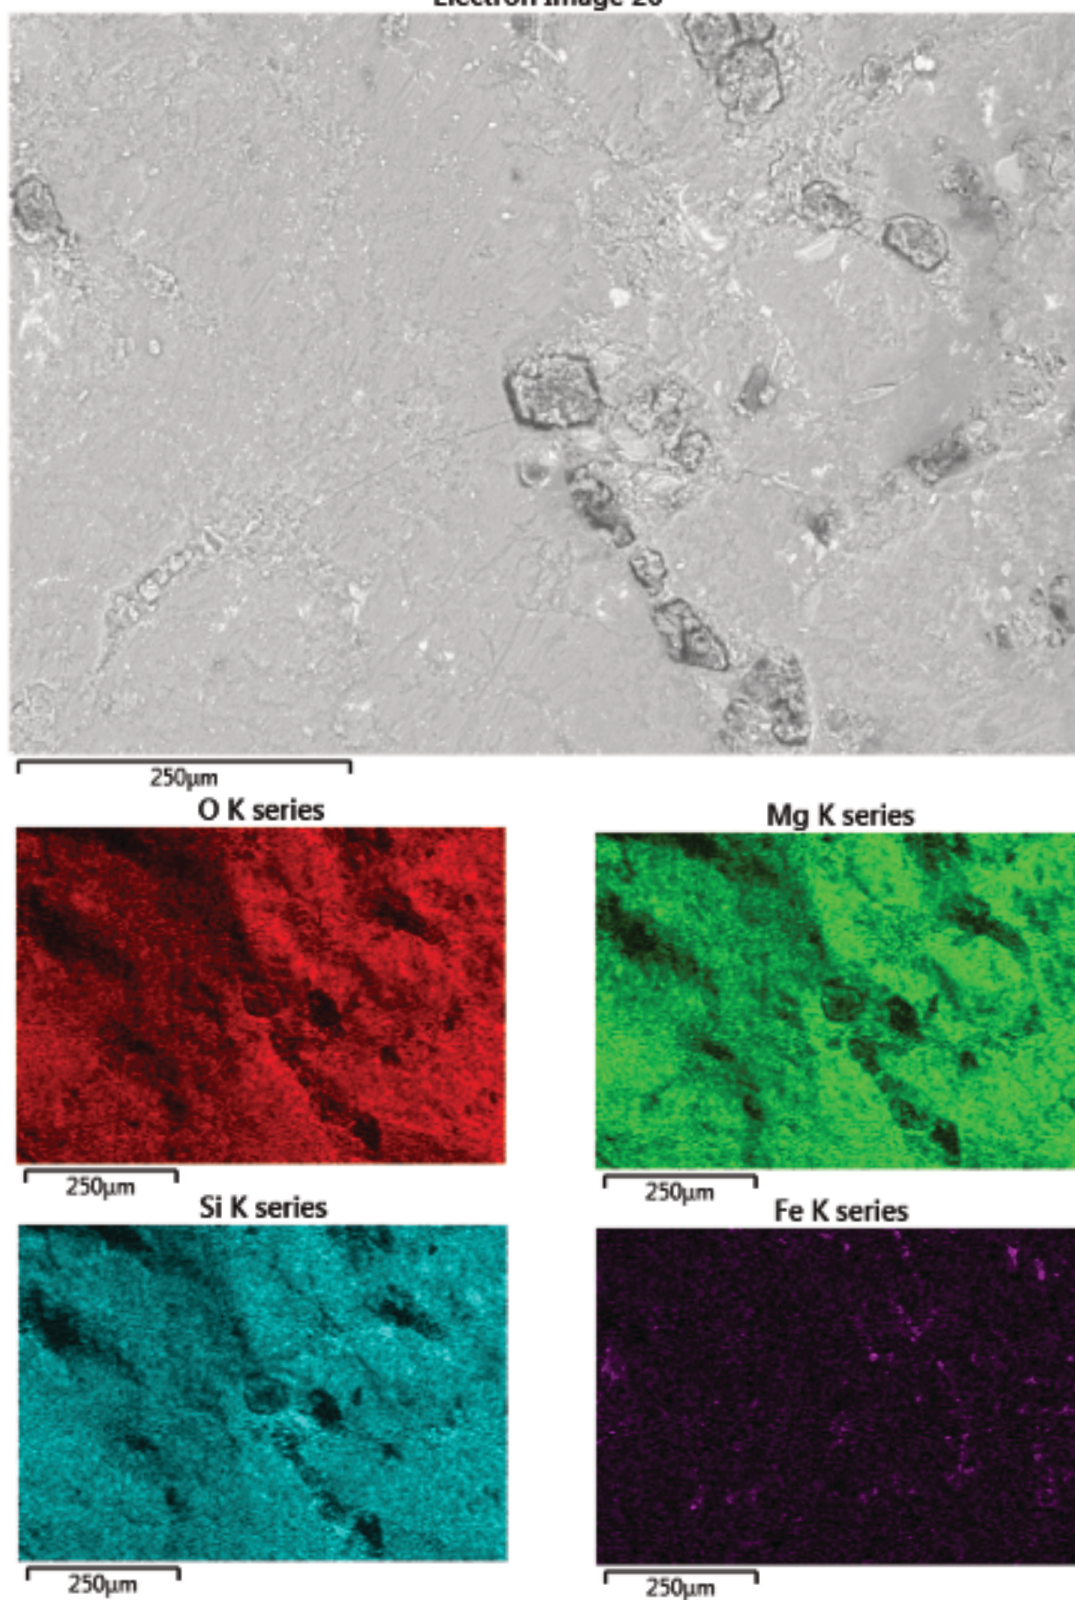

Figure S1. ESEM EDS mapping images, showing the elemental distribution of samples LB1 and LB2.

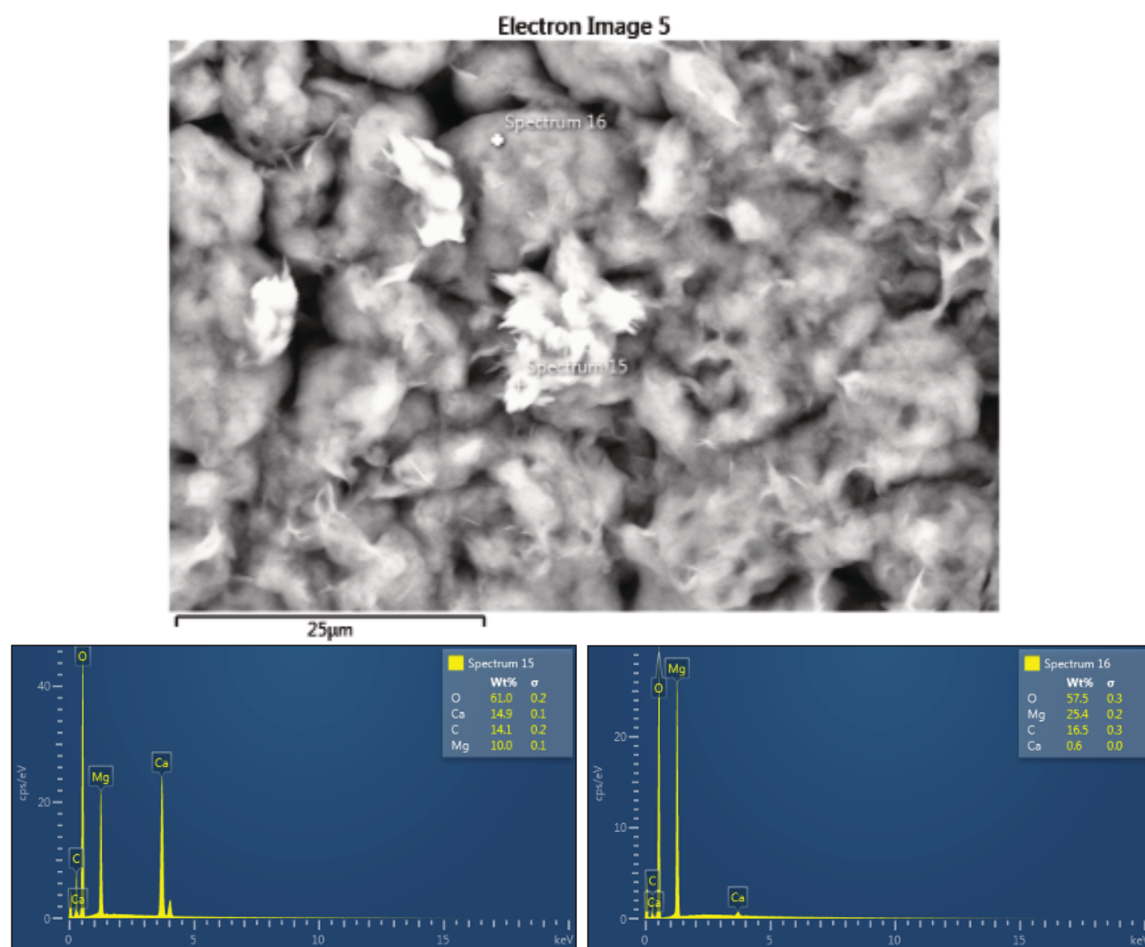

Figure S2. ESEM EDS spot analyses, showing the elemental composition of the BFE sample.

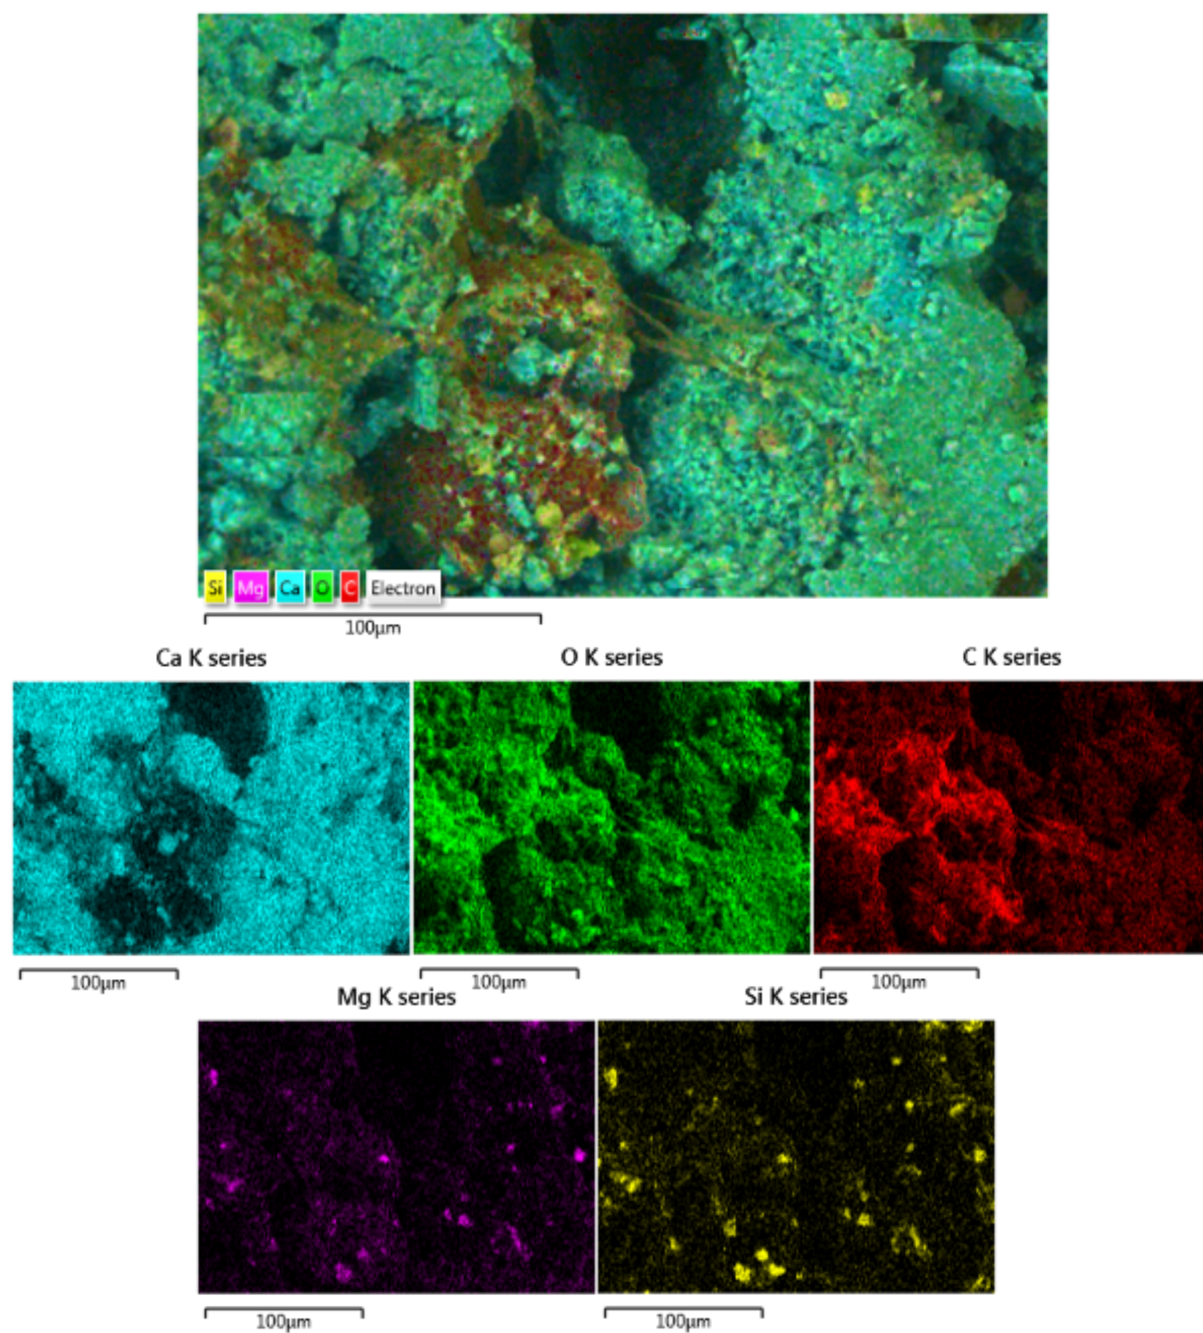

Figure S3. ESEM EDS mapping images, showing the elemental distribution of samples BF1 and BF2.



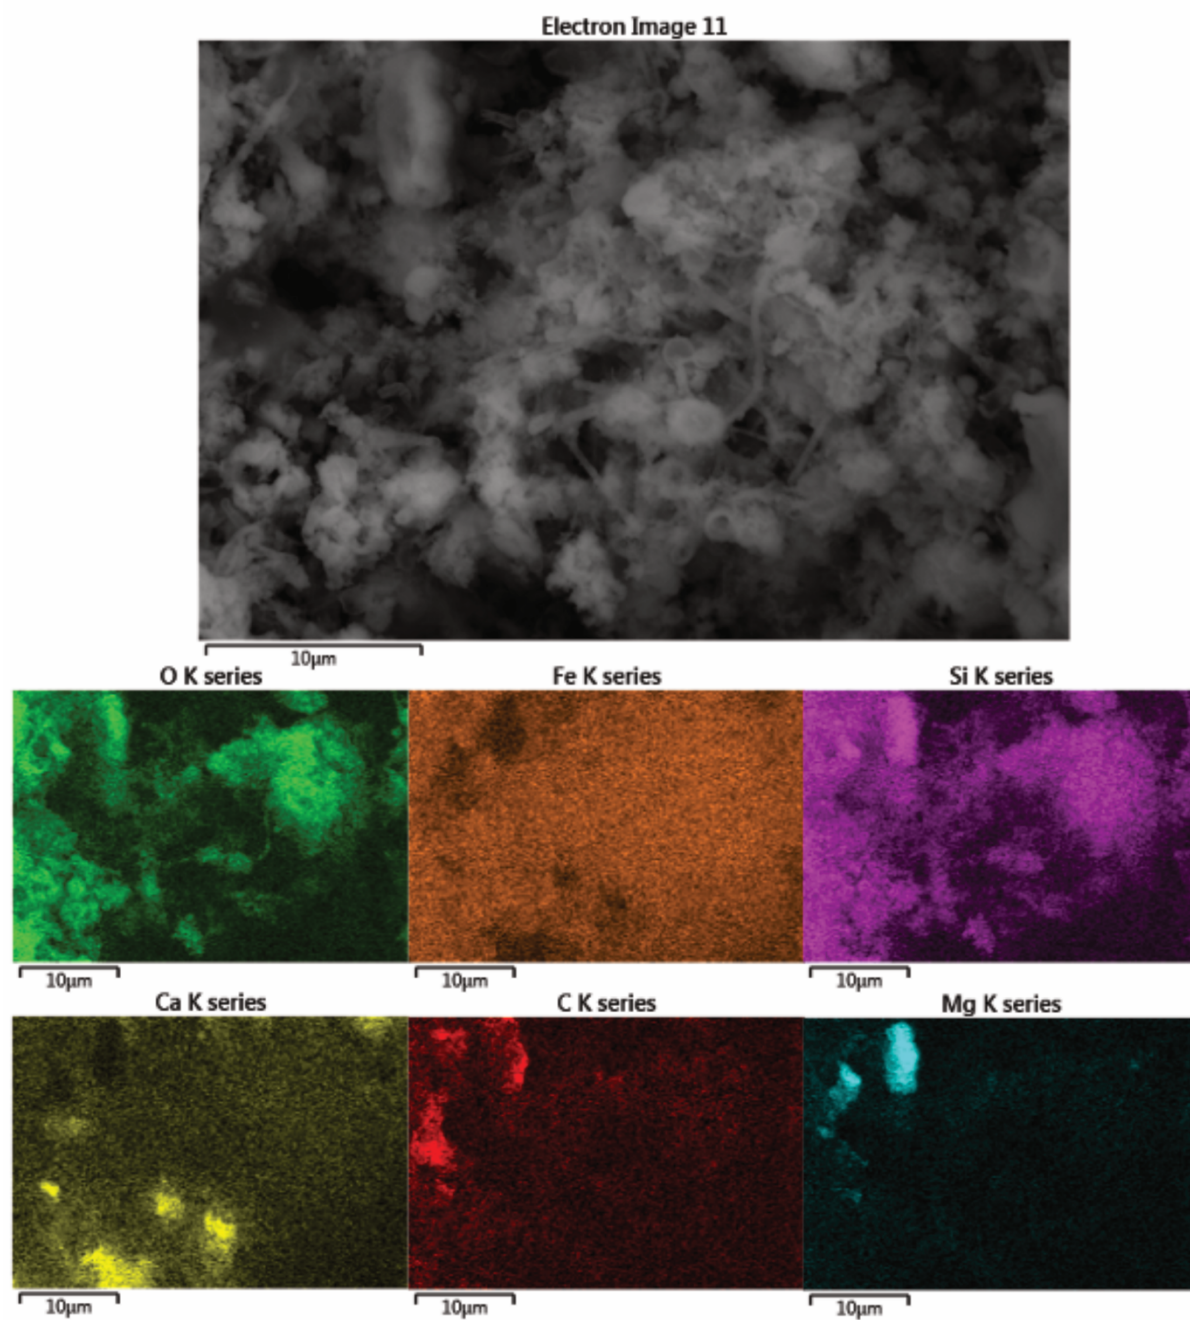

*Figure S4. ESEM EDS mapping images, showing the elemental distribution of the IR sample.*

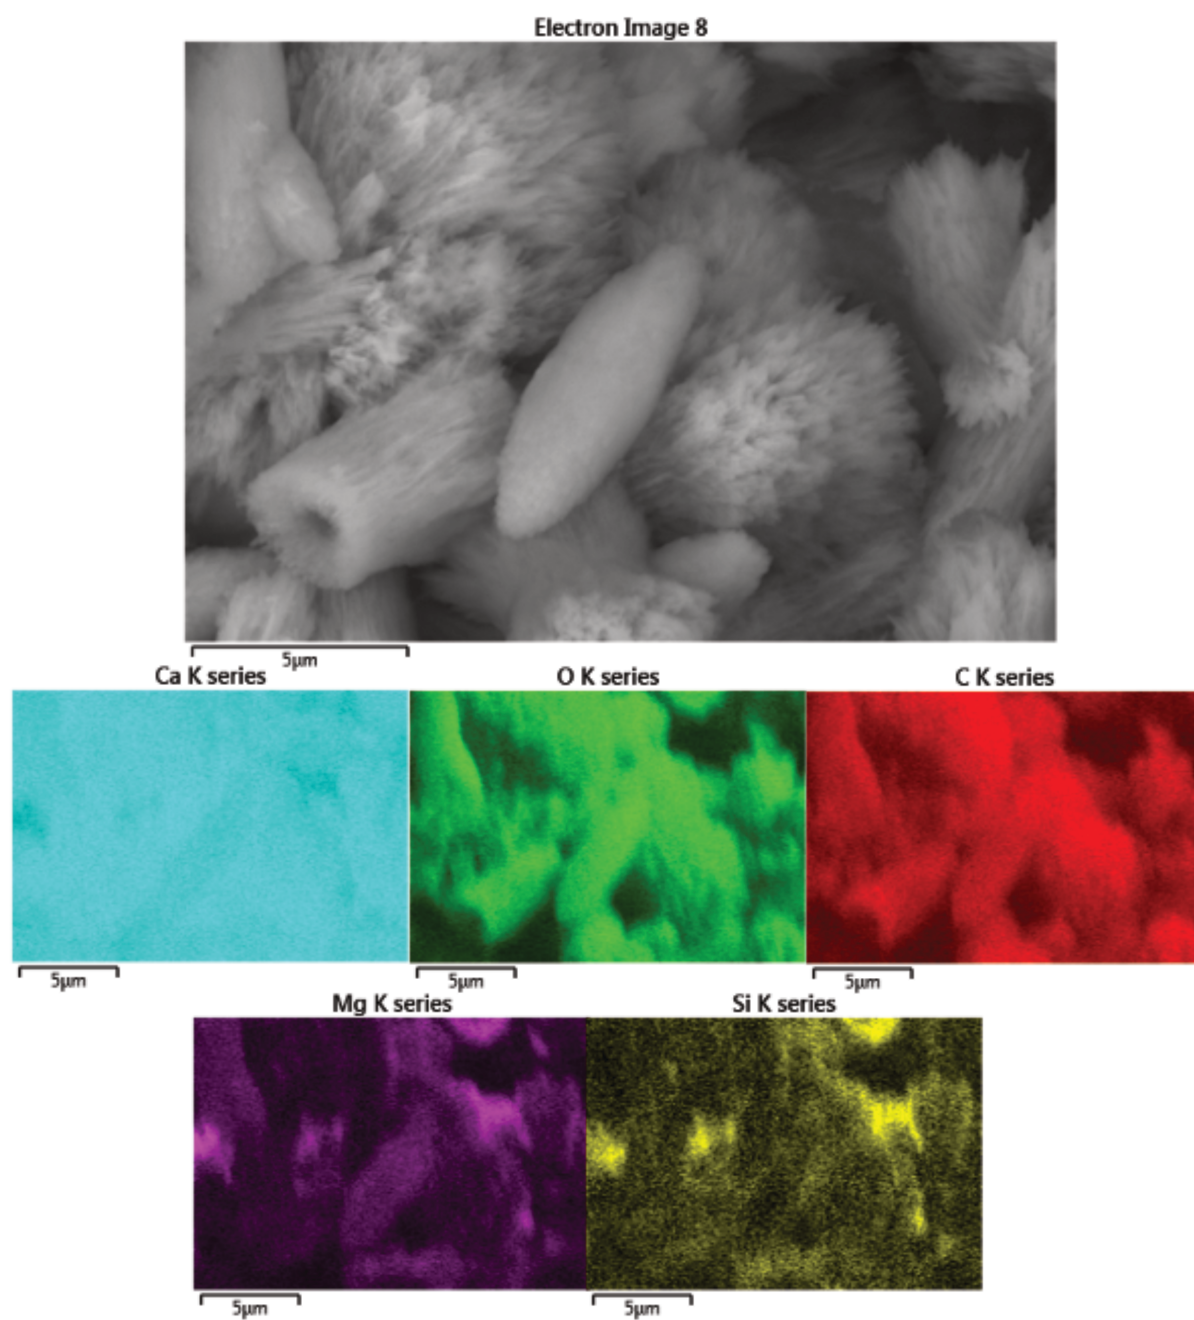

*Figure S5. ESEM EDS mapping images, showing the elemental distribution of the FG1 sample.*

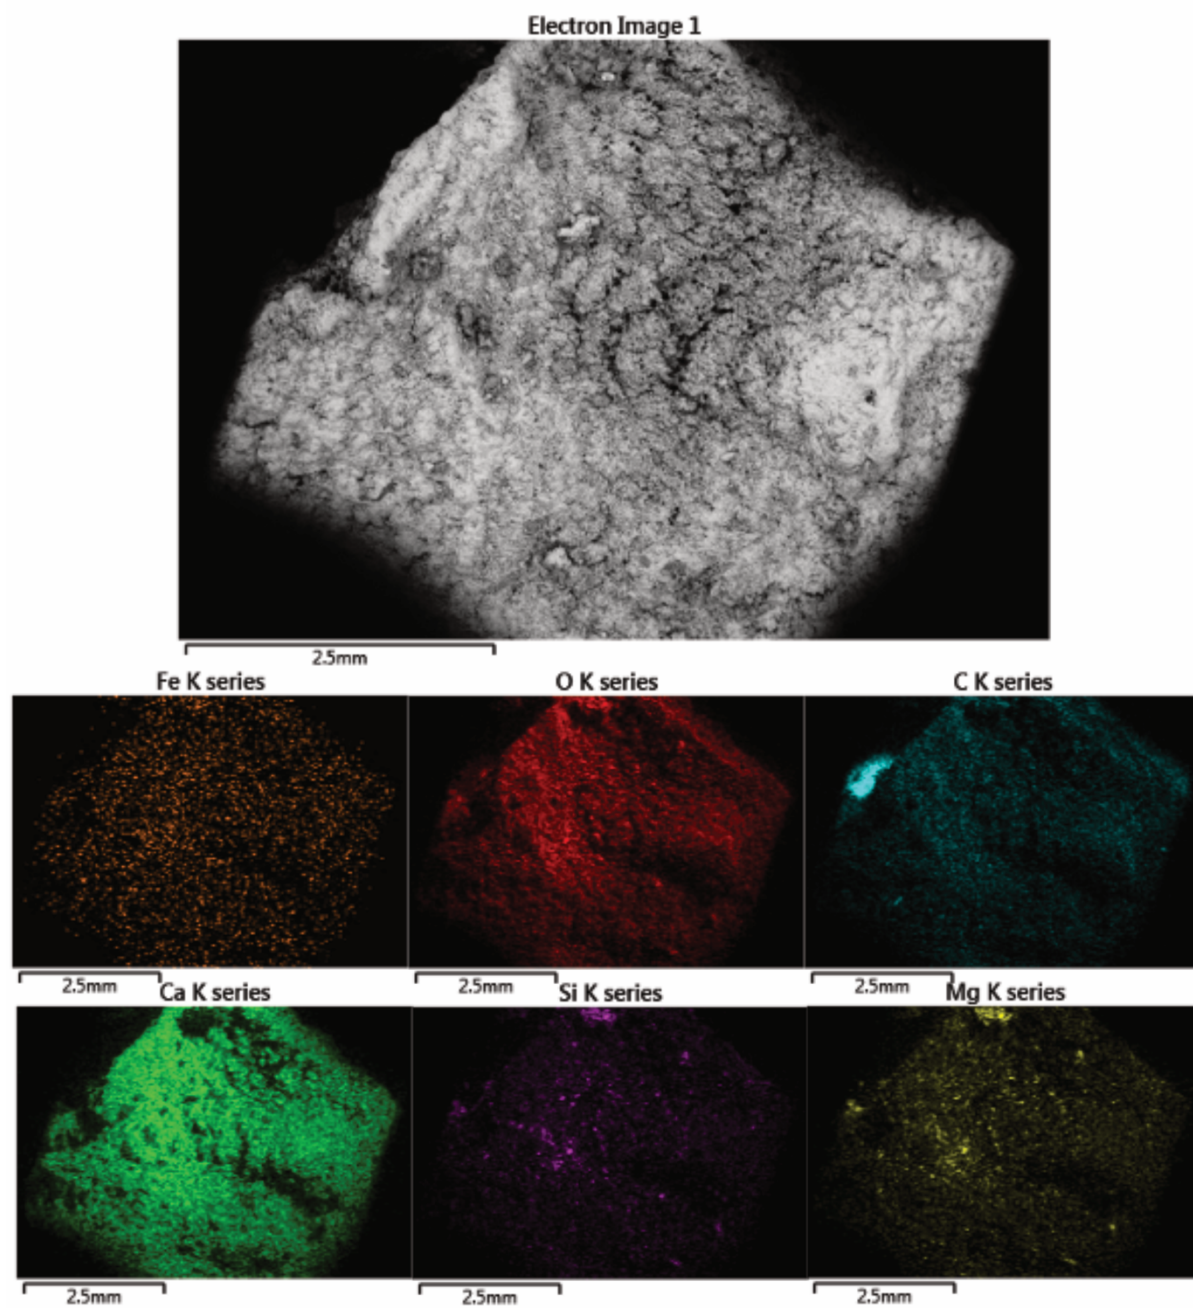

Figure S6. ESEM EDS mapping images, showing the elemental distribution of the FG2 sample.
